# Supplementary material for: Developing tools for evaluating inoculation methods of biocontrol Streptomyces sp. strains into grapevine plants
Source: PubMed Central journal article supplement (PMC6345443; doi:10.1371/journal.pone.0211225), 2019-01-24
Supplement: pone.0211225.s002.pdf [file pone.0211225.s002.pdf]

**A**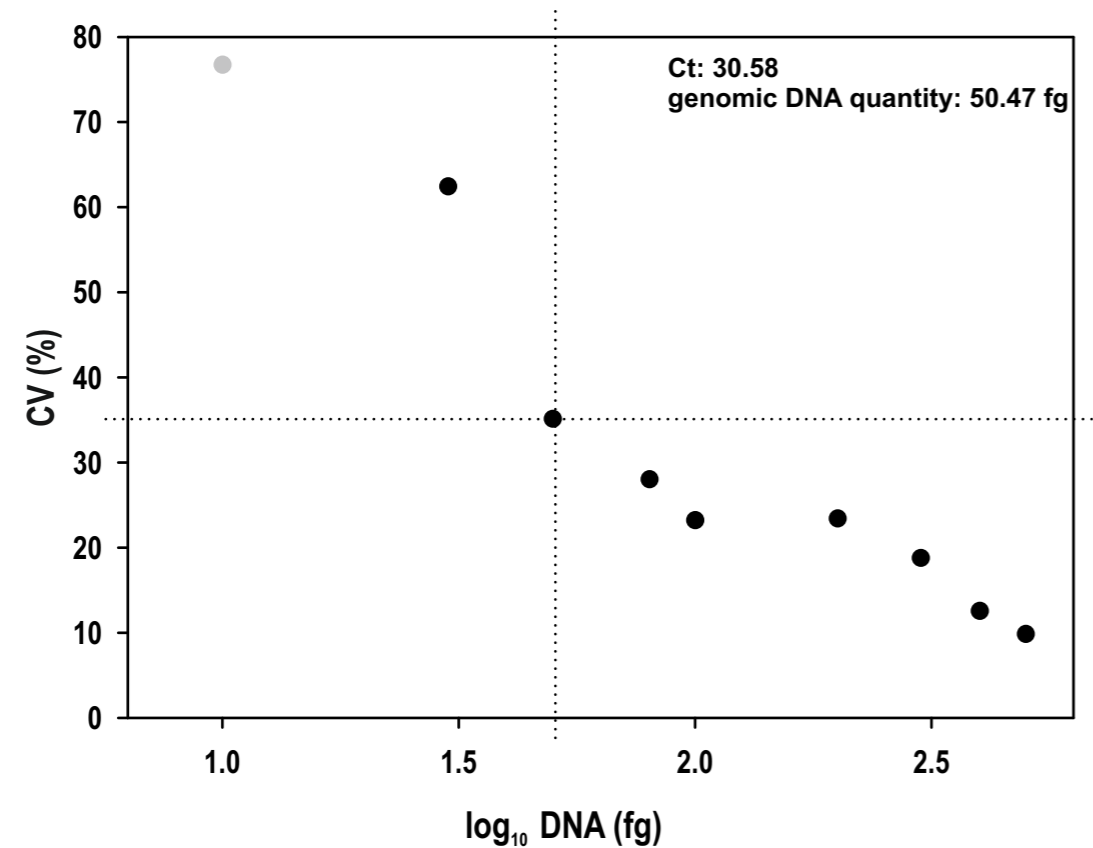**B**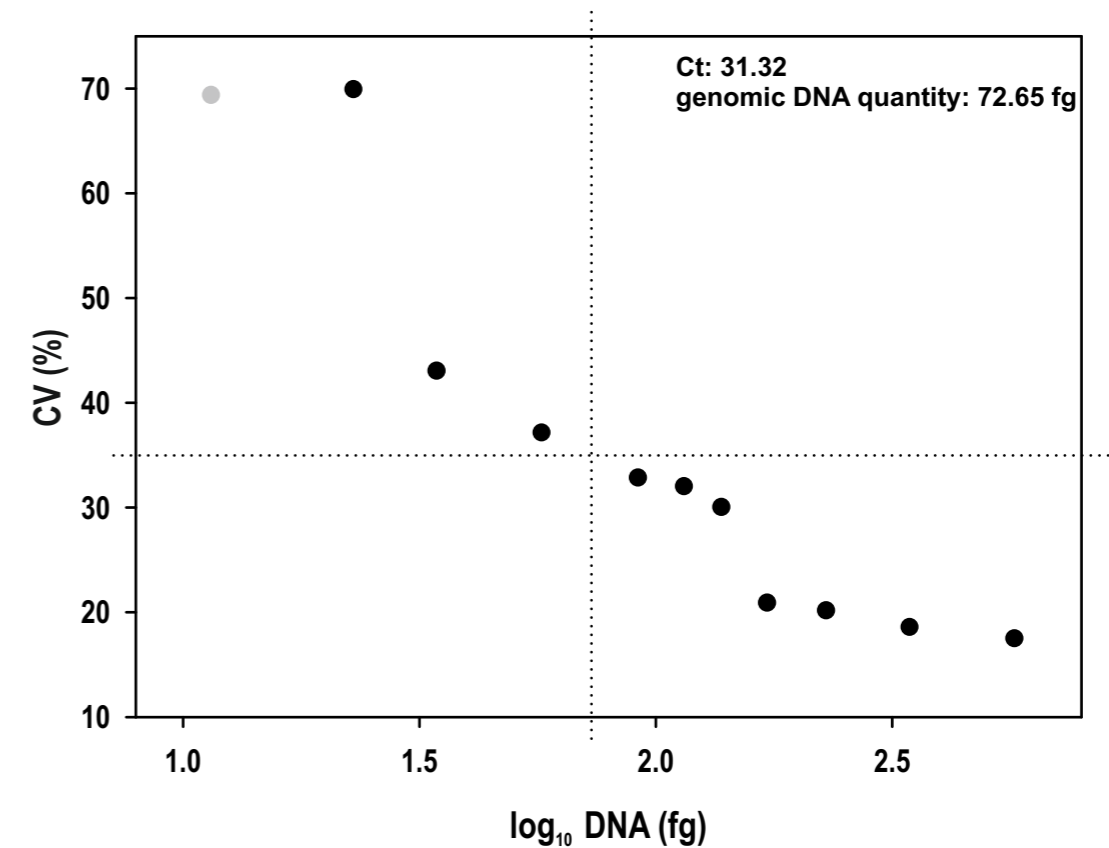

**S2 Fig. Limit of quantification (LOQ) from *Streptomyces* sp. VV/E1 and VV/R4 strains.** Coefficient of variation [ $CV = 100 \times (D/\text{mean value})$ ] of the back-calculated amounts of genomic DNA from (A) *Streptomyces* sp. VV/E1 and (B) *Streptomyces* sp. VV/R4 by qPCR assays (5 replicates). Horizontal dashed lines correspond to  $CV = 35\%$  and vertical dashed lines indicate the lowest quantity of DNA with a  $CV$  below  $35\%$  (obtained by interpolation). Grey symbols indicate the presence of negative (“non-detected”) replicates among samples.
