# Supplementary material for: Developing tools for evaluating inoculation methods of biocontrol Streptomyces sp. strains into grapevine plants
Source: PubMed Central journal article supplement (PMC6345443; doi:10.1371/journal.pone.0211225), 2019-01-24
Supplement: pone.0211225.s003.pdf [file pone.0211225.s003.pdf]

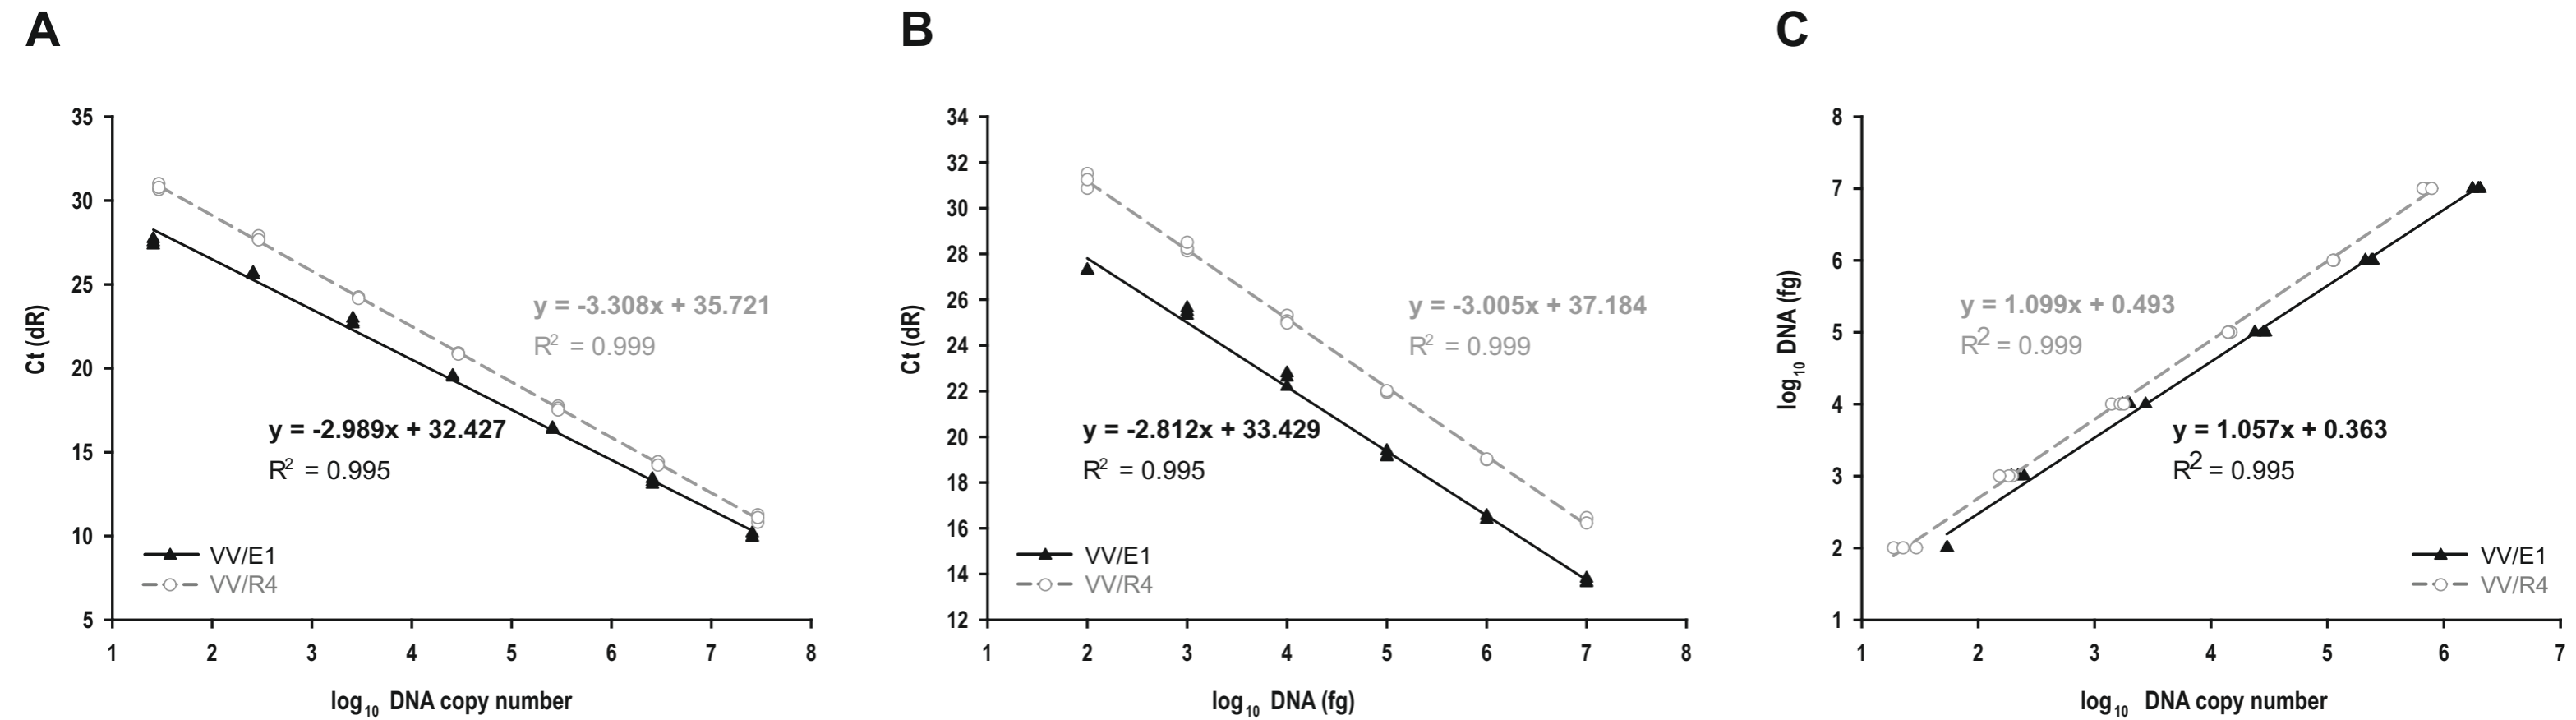

**S3 Fig. Correlation between quantity of genomic DNA and number of cells.** Standard curves obtained by plotting (A) the mean *Ct* values with respect to the logarithm of DNA copy number from purified and quantified PCR products. Standard curves obtained by plotting (B) the mean *Ct* values with respect to the logarithm of genomic DNA quantity (10-fold serial dilutions). (C) Correlation (logarithm scales) between genomic DNA quantity and the corresponding number of copies of each amplicon. *Streptomyces* sp. VV/E1 (black line) and *Streptomyces* sp. VV/R4 (grey line).
