# Supplementary material for: Developing tools for evaluating inoculation methods of biocontrol Streptomyces sp. strains into grapevine plants
Source: PubMed Central journal article supplement (PMC6345443; doi:10.1371/journal.pone.0211225), 2019-01-24
Supplement: pone.0211225.s004.pdf [file pone.0211225.s004.pdf]

**A**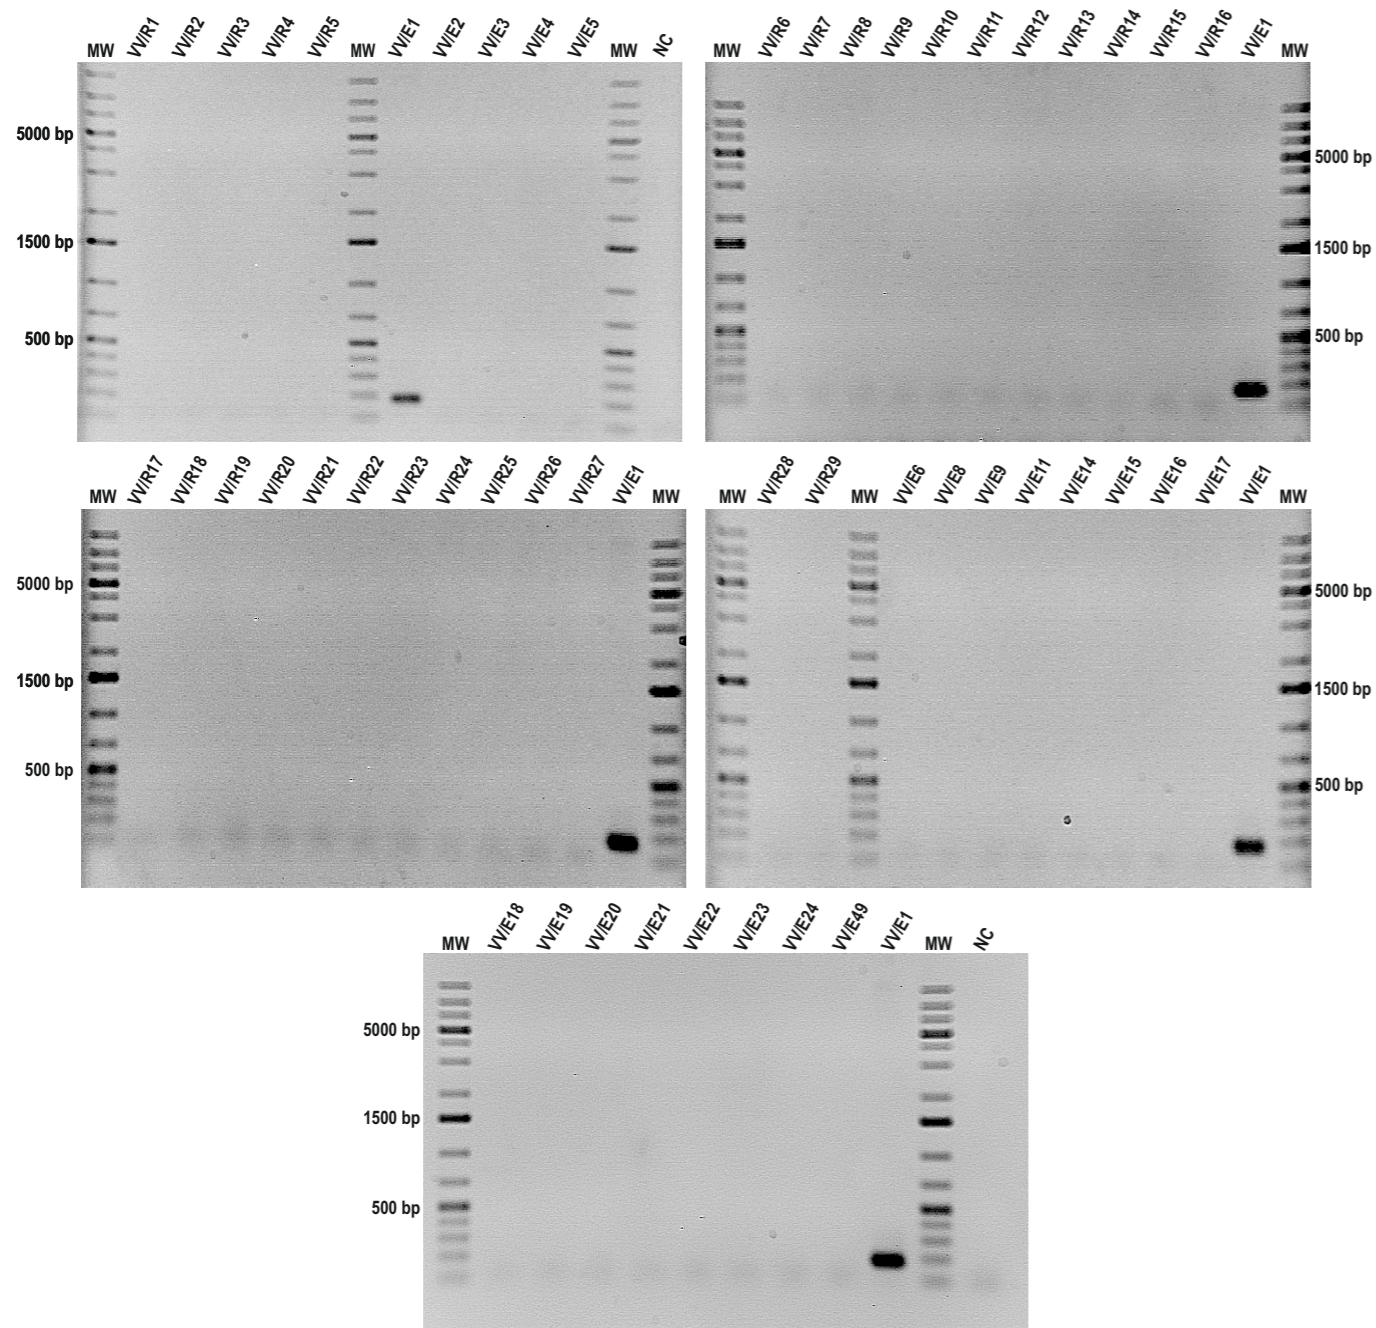**B**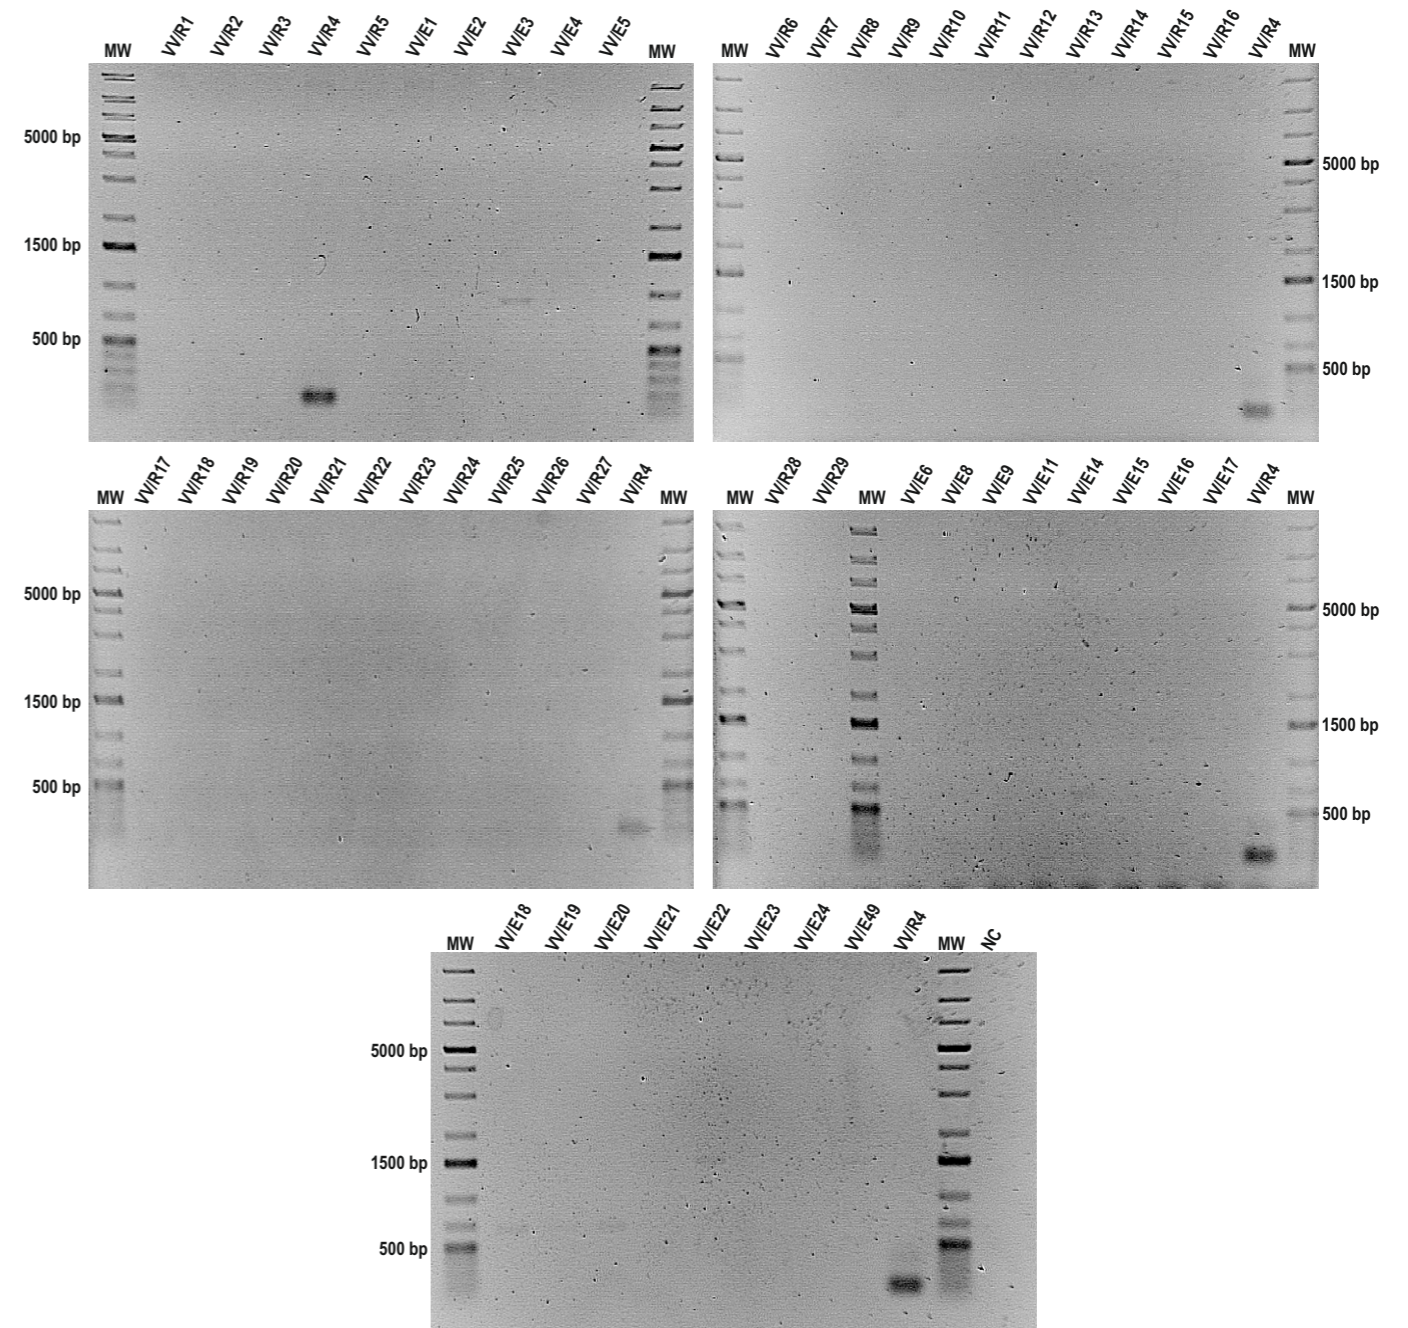

**S4 Fig. Specificity of SCAR primers.** Absence of amplification from the genomic DNA of 50 actinobacterial endophytic and rhizosphere strains isolated from grapevine plants of the selected SCAR markers by using SCAR primers (A) SCAR.E1\_fw/SCAR.E1\_rv and (B) SCAR.R4\_fw/SCAR.R4\_rv. Specific amplification bands were only detected for strains VV/E1 and VV/R4. MW: GeneRuler 1kb DNA Ladder Plus (Thermo Fisher Scientific). NC (negative control).
